# Supplementary material
Source: publisher figshare collection journal article supplement (https://acs.figshare.com/ndownloader/files/4171501)
Supplement: Supplementary file 1 [file 4171501]

## Supporting Information

### **Up-Conversion Cell Imaging and pH-Induced Thermally Controlled Drug Release from NaYF<sub>4</sub>: Yb<sup>3+</sup>/Er<sup>3+</sup>@Hydrogel Core-Shell Hybrid Microspheres**

*Yunlu Dai<sup>†,‡</sup>, Ping'an Ma<sup>†</sup>, Ziyong Cheng<sup>†,\*</sup>, Xiaojiao Kang<sup>†,‡</sup>, Xiao Zhang<sup>†</sup>,  
Zhiyao Hou<sup>†</sup>, Chunxia Li<sup>†</sup>, Dongmei Yang<sup>†,‡</sup>, Xuefeng Zhai<sup>†</sup>, and Jun Lin<sup>†,\*</sup>*

<sup>†</sup> State Key Laboratory of Rare Earth Resource Utilization, Changchun Institute of Applied Chemistry, Chinese Academy of Sciences, Changchun 130022 (P. R. China).

<sup>‡</sup> Graduate School of the Chinese Academy of Sciences, Beijing 100049 (P. R. China).

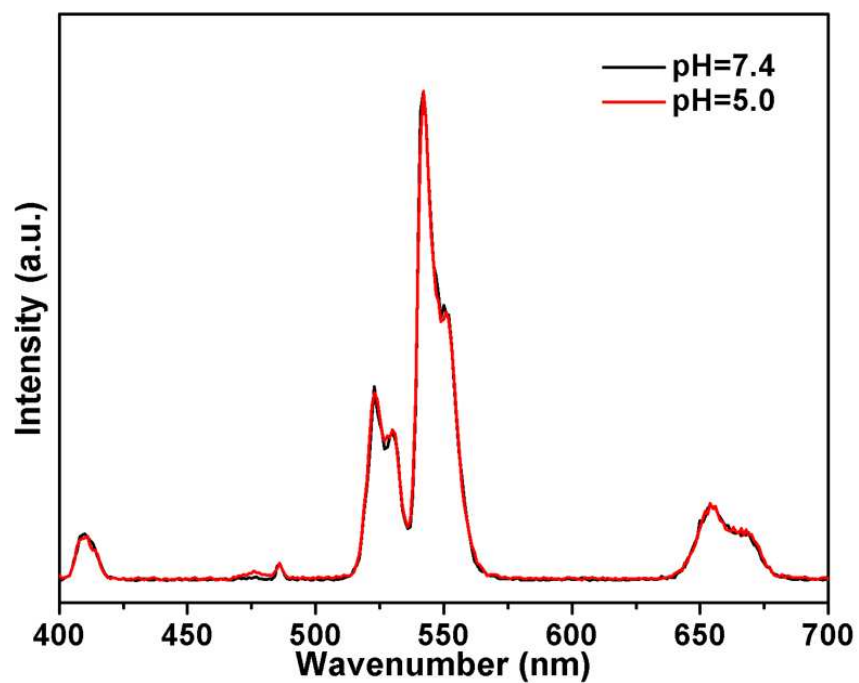

**Figure S1** The up-conversion emission spectra of NaYF<sub>4</sub>: Yb<sup>3+</sup>/Er<sup>3+</sup>@SiO<sub>2</sub>@P(NIPAM-co-MAA) under 980 nm excitation in PBS buffer solutions of different pH values (7.4 and 5.0). Both of the solution concentration is 5mg/mL.

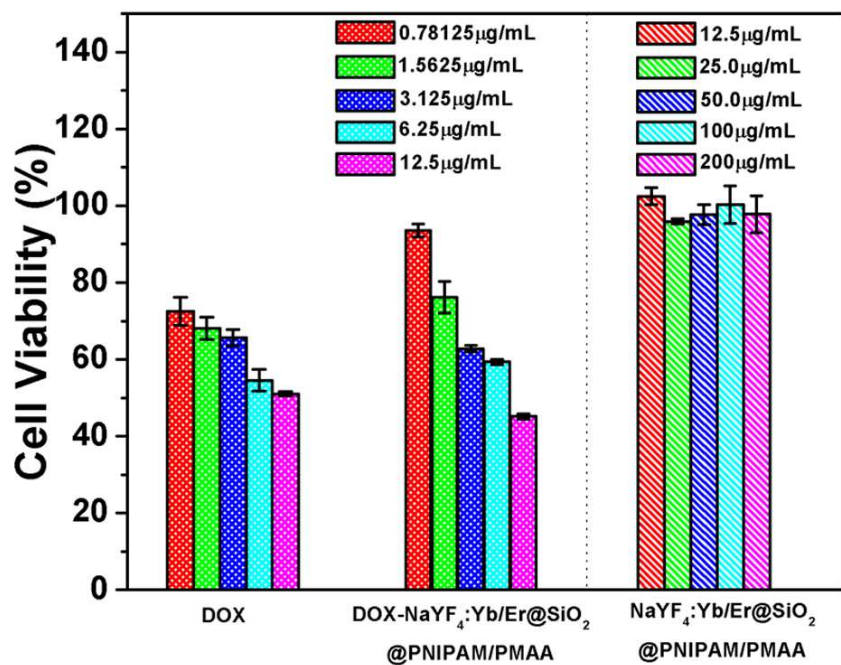

**Figure S2.** *In vitro* L929 cell viabilities after incubation 48 h with free DOX, DOX-loaded NaYF<sub>4</sub>: Yb<sup>3+</sup>/Er<sup>3+</sup>@SiO<sub>2</sub>@P(NIPAM-co-MAA) and bare NaYF<sub>4</sub>: Yb<sup>3+</sup>/Er<sup>3+</sup>@SiO<sub>2</sub>@P(NIPAM-co-MAA) microspheres at different concentrations.
